1 Mobility and non-household environments:  
2 understanding dengue transmission patterns in  
3 urban contexts

4

5 Víctor Hugo Peña-García<sup>1, †</sup>, Bryson A. Ndenga<sup>2</sup>, Francis M. Mutuku<sup>3</sup>, Donal Bisanzio<sup>4</sup>,  
6 A. Desiree LaBeaud<sup>5</sup>, Erin A. Mordecai<sup>1</sup>

7

8 <sup>1</sup> Department of Biology, Stanford University, Stanford, CA, USA

9 <sup>2</sup> Kenya Medical Research Institute, Kisumu, Kenya

10 <sup>3</sup> Department of Environmental and Health Sciences, Technical University of Mombasa,  
11 Mombasa, Kenya

12 <sup>4</sup> RTI International, Washington, DC, USA

13 <sup>5</sup> School of Medicine, Stanford University, Stanford, CA, USA

14

15 <sup>†</sup> Corresponding author:

16 email: [vhpena@stanford.edu](mailto:vhpena@stanford.edu)

17

## 18 **Abstract**

### 19 **Background**

20 Households (HH) have been traditionally described as the main environments where  
21 people are at risk of dengue (and other arbovirus) infection. Mounting entomological  
22 evidence has suggested a larger role of environments other than HH in transmission.  
23 Recently, an agent-based model (ABM) estimated that over half of infections occur in  
24 non-household (NH) environments like workplaces, markets, and recreational sites.  
25 However, the importance of human and vector mobility and the configurations of urban  
26 spaces in mediating the effects of NH on dengue transmission remains understudied.

### 27 **Methods**

28 To improve our knowledge of the relevance of NH in transmission, we expanded an  
29 ABM calibrated from field data in Kenya to examine movement of people and vectors  
30 under different spatial configurations of buildings. In this model, we assessed the  
31 number of people traveling between HH and NH and their distance. Those were studied  
32 on three different urban configurations, on which the NH are spatially distributed either  
33 randomly (scattered), centered (in a single center), or clustered (in more than one  
34 cluster).

### 35 **Results**

36 Across simulations, the number of people moving is a major influential variable where  
37 higher levels of movement between HH and NH increases the number of cases. In  
38 addition, the number of cases is higher when NH are scattered. Intriguingly, the

39 distance that people travel from HH to NH seems to have little effect on dengue burden;  
40 however, it affects the level of spatial clustering of cases.

## 41 **Conclusions**

42 These results highlight the importance of NH as a major spreader of infections between  
43 HH and NH environments supporting the relevance of NH in transmission and its  
44 interaction with human movement in driving dengue dynamics.

45

## 46 **Keywords**

47 Dengue transmission, Agent-based model, Human mobility, Urban Configuration, Non-  
48 household environments, Spatial Structure

49

## 50 **Background**

51 Dengue is a vector-borne disease prevalent and on the rise in most of the tropical and  
52 subtropical regions around the globe with frequent number of cases being present in  
53 non-endemic areas like USA and Europe [1, 2]. The main vector, *Aedes aegypti*, is  
54 highly anthropophilic, found very close to human environments and impacting the public  
55 health of urban environments [3, 4].

56 Historically, the main strategy to control the disease has been to reduce vector-human  
57 contact by reducing the size of mosquito populations. Conventional wisdom is that for  
58 effective control, these activities should be focused on households (HH) as the main

59 environment where transmission is happening [5, 6]. However, some studies have  
60 suggested that locations other than households might have an important role because  
61 of a significant presence of mosquitoes [7-10], and infected vectors [11]. In a recent  
62 study, we used an agent-based model (ABM) to quantify the number of infections in  
63 different types of urban spaces and estimated that over half of infections are happening  
64 in non-household (NH) environments, where the main high-risk spaces are workplaces  
65 and markets/shops [12].

66 These results have implications for dengue epidemiology since the high flux of people  
67 through NH suggests that these spaces can contribute to the spread of infections. In  
68 this way, the total number of infections can be affected by the distribution in space of  
69 NH and the movement of people between HH and NH. However, these intra-urban  
70 dynamics have never been described in the context of different roles among HH and  
71 different NH space types [13-16], though Massaro and colleagues used mobile phone  
72 data to get estimates for movement between workplaces [17].

73 Building on a previous result showing the importance of NH for dengue transmission,  
74 we now evaluate how levels of human and vector mobility as well as different urban  
75 spatial configurations of NH affect dengue transmission. In particular, what role does  
76 spatial configuration of NH spaces play, along with the extent to which people and  
77 mosquitoes move between spaces, in determining dengue dynamics? To address this,  
78 we modified a previously published ABM [12] to make it spatially explicit by assigning  
79 coordinates that mimic different urban conformations and evaluated different scenarios  
80 of movement of people and vectors. We then assessed how these variables affect the

81 burden of dengue and the spatial patterns to understand urban-level transmission  
82 dynamics.

83

## 84 Methods

### 85 Model overview

86 To achieve the aims of this study, we modified the ABM previously used to describe the  
87 importance of HH and NH in transmission [12]. The model was developed to quantify  
88 the relative contribution of five different types of NH (workplaces, markets or shops,  
89 recreational, religious, and schools) and HH to dengue burden. The model development  
90 and calibration were based on data from two Kenyan cities: Kisumu in the west and  
91 Ukunda on the coast [12]. Here, we focus on parameters calibrated to Kisumu, although  
92 additional results including dynamics from Ukunda are found in supporting information.

93 The model represents the movement of people between HH and two different types of  
94 NH locations: daily-commuting locations where individuals attend daily and meet with  
95 the same individuals like schools and workplaces, and randomly assigned locations for  
96 which both the number and identity of people who visit them is randomly defined every  
97 day. The latter include locations like markets or shops, recreational and religious spaces.  
98 Movement between HH (categorized as “visit”) is also included in the model for which its  
99 frequency is daily determined with probability of 0.1. Based on vector surveys  
100 conducted over two years of fieldwork previously published [18], NH and HH  
101 environments were assigned to have mosquito presence or absence based on

102 observed prevalence of mosquitoes. Population dynamics of vectors were modeled at  
103 the building level, whereby the sub-population dynamics are determined based on  
104 building-level conditions like the presence of water containers and the total amount of  
105 water they can hold, again informed by field vector surveillance data. These dynamics  
106 as well as infection dynamics of vectors are also determined by temperature by using  
107 functions previously described and widely used elsewhere [19-21].

108 Initial baseline prevalence of dengue was set to 0.08%, estimated from previous studies  
109 reporting age-structured seroprevalence [22] with an incidence rate per year estimated  
110 as  $IR = -\frac{1}{age} \ln(1 - prevalence)$ . Transmission events happen in those locations where  
111 infected vectors contact susceptible humans or vice versa. Mosquitoes bite depending  
112 on both temperature-dependent biting rate and the probability of having a successful  
113 vector-human encounter, which depends on the amount of time that humans spend in  
114 the location (Details can be found in supporting information). Infection status of  
115 mosquitoes can be either susceptible, exposed, or infected while humans can be either  
116 susceptible, exposed, infected, or recovered and (temporarily) immune. The time that  
117 mosquitoes spend as exposed depends on temperature (extrinsic incubation period)  
118 and is determined in the model by equations reported previously by Mordecai and  
119 colleagues [19]. Once infected, mosquitoes remain in this stage until death, which is  
120 evaluated daily following a temperature-dependent death rate. Humans remain  
121 susceptible until they are bit by infected mosquitoes and moved to latent stage where  
122 they remain for five days. Then, the individual is moved to the infectious stage which  
123 lasts seven days before moving to the recovered stage. Since the model does not  
124 explicitly represent dynamics of different serotypes, waning immune protection was

125 based on Sabin's classic studies describing the loss of complete heterotypic protection  
126 after roughly three months [23, 24] to set a return to susceptible after 100 days on  
127 recovered status. The number of infections in each location is recorded daily. Statistics  
128 about the total number of infections and locations are provided weekly. The model  
129 simulates transmission dynamics happening for 731 days (comprising temperature  
130 conditions between January 1<sup>st</sup> of 2020 until December 31<sup>st</sup> of 2021) and results are  
131 shown as a distribution of the number of infections over 200 simulations. The model and  
132 modifications described in this work were coded in Julia language (v1.10.0) and  
133 simulations were run on Sherlock computational cluster (Stanford Research Computing  
134 Center).

135

## 136 Spatial variables

137 The original model was not spatially explicit and hence the movement of individuals was  
138 assumed to be totally random. As such, the resultant infections arise from complete  
139 mixing of individuals among structures, which is not realistic and does not capture local,  
140 intra-urban spatial phenomena. To include mobility-associated variables and describe  
141 such local phenomena, we made the model spatially explicit. No real spatial coordinates  
142 were used so we could record the outcome when different urban conformations are  
143 tested by using the same set of spatial coordinates. In this way, we can assure that  
144 differences are due to the building designation as HH or NH and not by the specific set  
145 of spatial coordinates. Because the model considers synthetic populations of about  
146 20,000 people, the total municipality areas were rescaled to fit the total number of

147 structures of the virtual populations while considering similar densities. Spatial  
148 coordinates were randomly generated to create a synthetic settlement and assigned to  
149 each structure of the population. With the aim to capture different real setting  
150 conformations, coordinate assignments were done based on either “Scattered”  
151 (randomly distributed), “Centered” (majority of NH concentrated in the center of the city  
152 in a single cluster), or “Clustered” (majority of NH concentrated in three clusters)  
153 configurations (Figure 1).

154

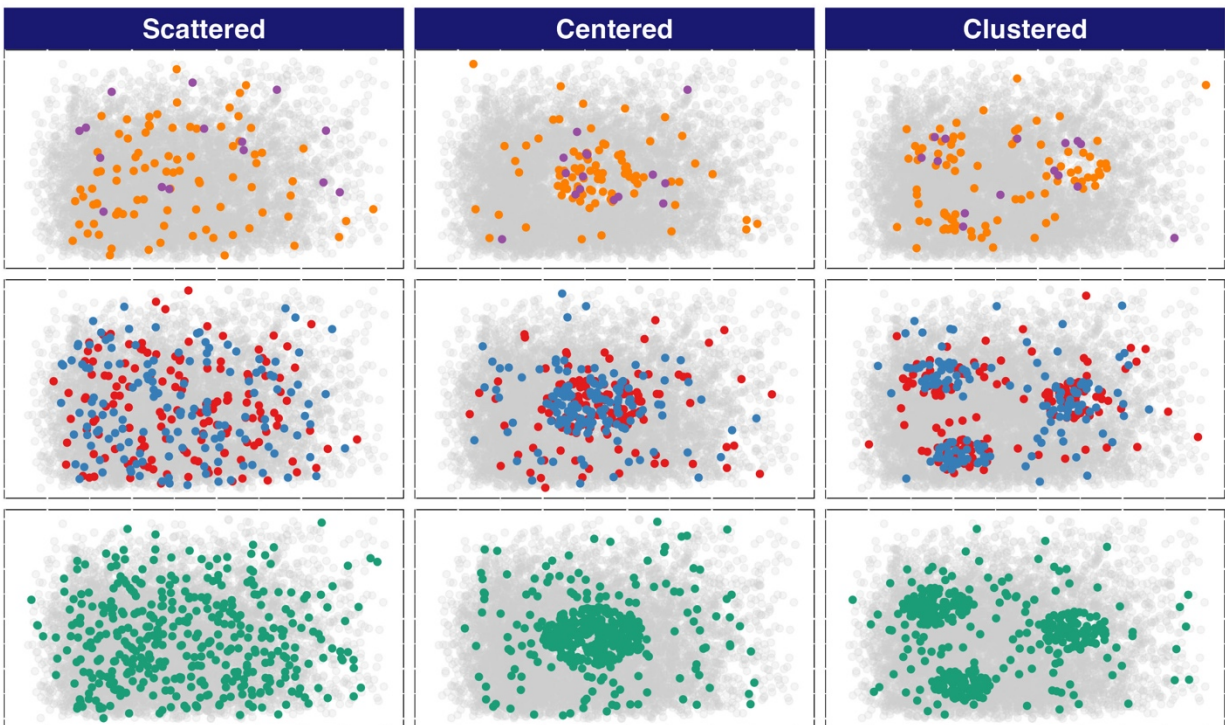

155

□ Workplace □ Market □ Religious □ Recreational □ School

156 **Figure 1: Spatial distribution of NH for three different urban conformations to be**  
157 **tested:** scattered (NH randomly distributed in space), centered (majority of NH are  
158 clustered in the center), and clustered (majority of NH are grouped in three clusters).



159 NH are shown with colors while HH are displayed as light gray points. Religious and  
160 schools are represented in the first row, markets/shops and recreational in middle row  
161 and more frequent NH, workplaces, are represented in the lower row.

162

## 163 Movement of people

164 We included two movement-related variables: the distance from each household (HH)  
165 to the nearest non-household (NH) locations and the number of people moving. To  
166 control movement distances, we applied three treatments: (1) limiting attendance to the  
167 nearest NH locations (assigned as distance zero), (2) allowing attendance to NH  
168 locations at least 500 meters away, and (3) allowing attendance to NH locations at least  
169 1000 meters away from each HH. These treatments were applied across the three  
170 different urban configurations.

171 In the clustered or centralized configurations, assigning the closest NH locations to HHs  
172 would primarily select NH sites at the periphery of each cluster, potentially leading to  
173 biased representations. To address this, we generated a list of NH locations sorted by  
174 proximity for each HH and allocated the closest NHs based on the number of  
175 inhabitants in the HH. For example, if a HH had four inhabitants, the four closest NHs  
176 were assigned to it. This approach ensured a more representative distribution across all  
177 HHs.

178 The number of people visiting NH was simulated at three levels. First, we included the  
179 same levels previously described in the model, categorized as 100% mobility [12]. This  
180 treatment includes all students and workers attending their respective school and

181 workplace, and random-attendance locations (religious, markets/shops, and  
182 recreational). Unfortunately, no data were available on the number of individuals visiting  
183 these types of locations. We anticipated significant variability due to the influence of  
184 several unmodeled factors. To account for this uncertainty, we relied on discussions  
185 with local residents to estimate a range of possible visitor numbers. We then applied a  
186 uniform distribution, with a minimum of 10 and a maximum of 70 individuals, to cover a  
187 broad spectrum of potential scenarios. The number of people visiting a given location is  
188 determined daily. We also evaluated the number of cases when decreasing the number  
189 of people moving to school and workplaces to 50% and remaining NH locations to a  
190 uniform distribution with parameters minimum = 5 and maximum = 35. Finally, we  
191 include a level of people movement of 20% for school and workplaces and uniform  
192 distribution with parameters minimum = 2 and maximum = 14 for random-attendance  
193 locations.

194

## 195 Movement of mosquitoes

196 In line with the inclusion of spatial variables and human movement, we included the  
197 movement of vectors. There were no data available to characterize the rate of  
198 movement of mosquitoes into new areas. As a result, we parameterized such  
199 movement by considering two variables—availability of both breeding and blood-feeding  
200 resources—to estimate a baseline migration probability for the number of mosquitoes  
201 moving from given locations.

202 The model includes a local density-dependent function that allows for the mosquito  
203 population to grow in a location-specific way, representing dynamics previously  
204 described for a fragmented environment [25]. The function is already described  
205 elsewhere [12] and depends on temperature (peaking at 29°C) and the density of  
206 immatures according to water availability, as follows:

$$f(D) = \frac{1}{1 + e^{bD-a}} d(T) \#(1)$$

207 Where

$$d(T) = -0.166 + 0.08T - 0.0014T^2 \#(2)$$

208

209 In this equation  $a$  and  $b$  are calibrated parameters,  $D$  is the larval density expressed as  
210 the ratio of the number of larvae to liters of water available for breeding in the structure,  
211 and  $d(T)$  is the term describing the temperature-dependence of population growth  
212 (additional details in supporting information).

213 By using this function, the growth of the mosquito sub-population (in a given building)  
214 depends on the amount of water resources available. In this way, when the mosquito  
215 population has grown so the water resources are depleted (reaching the carrying  
216 capacity), the mortality of immatures is higher and the probability for a given mosquito to  
217 migrate out of the building increases (details provided in supporting information).

218 Additionally, we considered for migration the possibility that human blood availability is  
219 not satisfying the mosquito subpopulation needs in a given building. For this purpose,  
220 the number of females that fed in each day was estimated by considering the number of

221 females biting ( $N_b$ ) and the probability for those to have a successful feeding encounter  
222 with a human the same day ( $P(bit)$ ). The latter is determined considering the number of  
223 inhabitants, the time they spend at home and the time a visitor spends in each location  
224 (details are provided in supporting information). The final number of fed females ( $N_F$ ) is  
225 estimated by

$$N_F \sim Bin(N_b, P(bit)) \#(3)$$

226 Thus, when the difference between the number of mosquitoes trying to bite and the  
227 actual number of mosquitoes that are fed is large, the probability of migration increases.  
228 Once a mosquito migrates, a new location is assigned by considering a dispersal kernel  
229 [26]. Following previous work [27], we used a lognormal function with the form

$$P_D = \frac{1}{(2\pi)^{\frac{3}{2}} b d^2} e^{-\frac{\log(d/a)^2}{2b^2}} \#(4)$$

230 Where  $d$  is distance and both  $a$  and  $b$  are parameters to be estimated. We fitted a  
231 function by assuming a mean dispersal distance of 105.69 meters, as estimated for  
232 *Aedes aegypti* by [28].

233

## 234 Spatial autocorrelation

235 By taking advantage of spatial features introduced in the model, we performed a spatial  
236 autocorrelation analysis to evaluate the level of clustering of dengue cases recorded in  
237 each simulation as a function of urban configuration and human and mosquito mobility.  
238 To do this, the household location of each infection is recorded so a Global Moran's  $I$

239 index [29] could be estimated at the end of the simulated period. Global Moran's  $I$   
240 ranges from -1 to +1 where -1 means totally dispersed location of cases while a value of  
241 1 represents a spatial distribution that is totally clustered (total separation between  
242 locations with dengue cases and those without cases). In this sense, the null hypothesis  
243 of this analysis is that dengue cases are randomly distributed in municipalities,  
244 represented by Moran's  $I$  value of 0 [30]. The analysis was done for every simulation by  
245 using 1,000 permutations for inference in each of them. Analyses were done using the  
246 package `SpatialDependence.jl` implemented in Julia language (v 1.10.0).

247

## 248 Results

### 249 Burden of dengue is strongly affected by number of people 250 visiting NH

251 We quantified the total number of cases after two years of transmission. When we  
252 simulated the epidemic under different human movement regimes, it was evident that  
253 the number of cases decreased as the number of people moving from HH decreased.  
254 For 100% human movement, irrespective of the urban conformation, we estimated a  
255 median of 4,228 cases (IQR: 3,025 – 4,921), which decreased to a median of 764 (IQR:  
256 349 – 1,626) and 154 (IQR: 108 – 232) cases for 50% and 20% human movement,  
257 respectively (Figure 2 and S1 Table) (all results are derived from the model calibrated  
258 for Kisumu, Kenya; see supporting information for further results for Ukunda, Kenya).

259

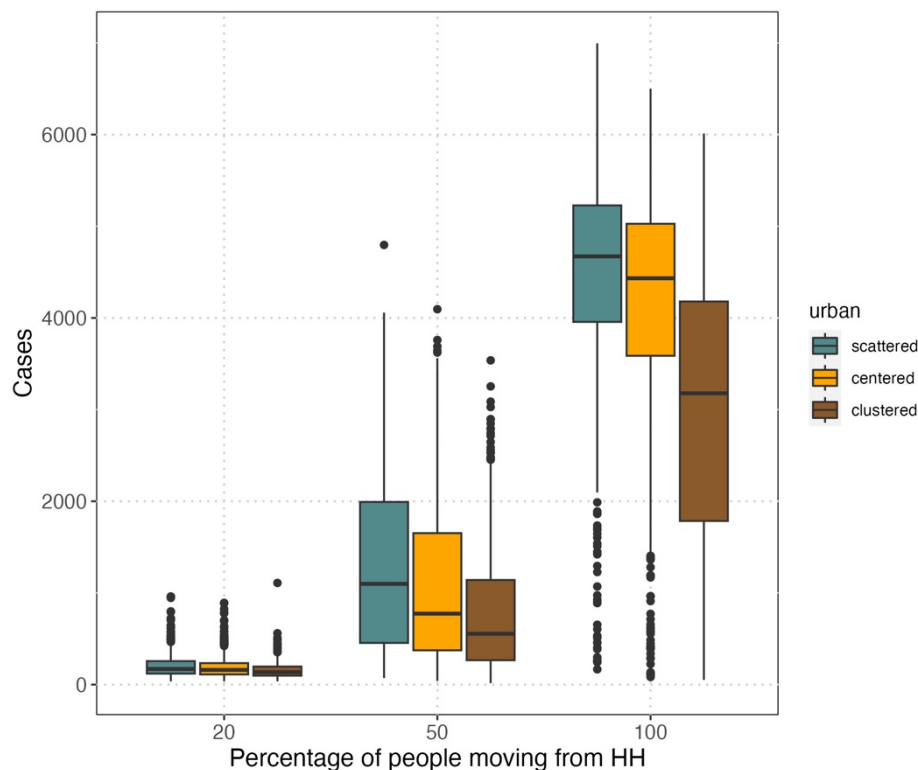

260

261 **Figure 2: Increasing the number of people moving from HH to NH significantly**  
262 **increases the burden of dengue under three NH spatial distribution scenarios.**

263 Three levels of human movement were assessed (20%, 50%, and 100%) on three  
264 urban conformations (scattered, centered, or clustered). Boxplots shows the distribution  
265 of the total number of infections for 200 runs of two-year simulation where median is the  
266 horizontal line, the filled box is the interquartile (IQR) range, the whiskers show the  
267 values above and under the IQR and no more than 1.5·IQR, and dots are representing  
268 values beyond this range.

269

270 Additionally, the scenario where NH locations are spatially randomly distributed  
271 produced more cases, though at all movement levels the interquartile ranges for  
272 different spatial configurations overlapped (Figure 2). At 100% movement, scattered  
273 conformation yielded a median of 4,672 (IQR: 3,956 – 5,227) while the centered and  
274 clustered scenarios produced, respectively, medians of 4,432 (IQR: 3,587 – 5,027) and  
275 3,178 (IQR: 1,785 – 4,179) (S2 Table).

276 When we compared HH and NH environments, the number of infections is slightly  
277 higher in HH at lower levels of movement and hence lower transmission. However, at  
278 higher levels of movement, the number of infections in NH are higher than HH. In this  
279 way, at 100% movement, irrespective of urban conformation, NH produced 67% of the  
280 cases, but this proportion decreased to 58.8% and to 42.3% at 50% and 20% of human  
281 movement, respectively (Figure 3 and S1 Table).

282 It is worth noting that different levels of mosquito movement were found to influence  
283 transmission. Specifically, transmission decreases at higher levels of movement due to  
284 migration-mediated mortality (see supplemental results and discussion).

285

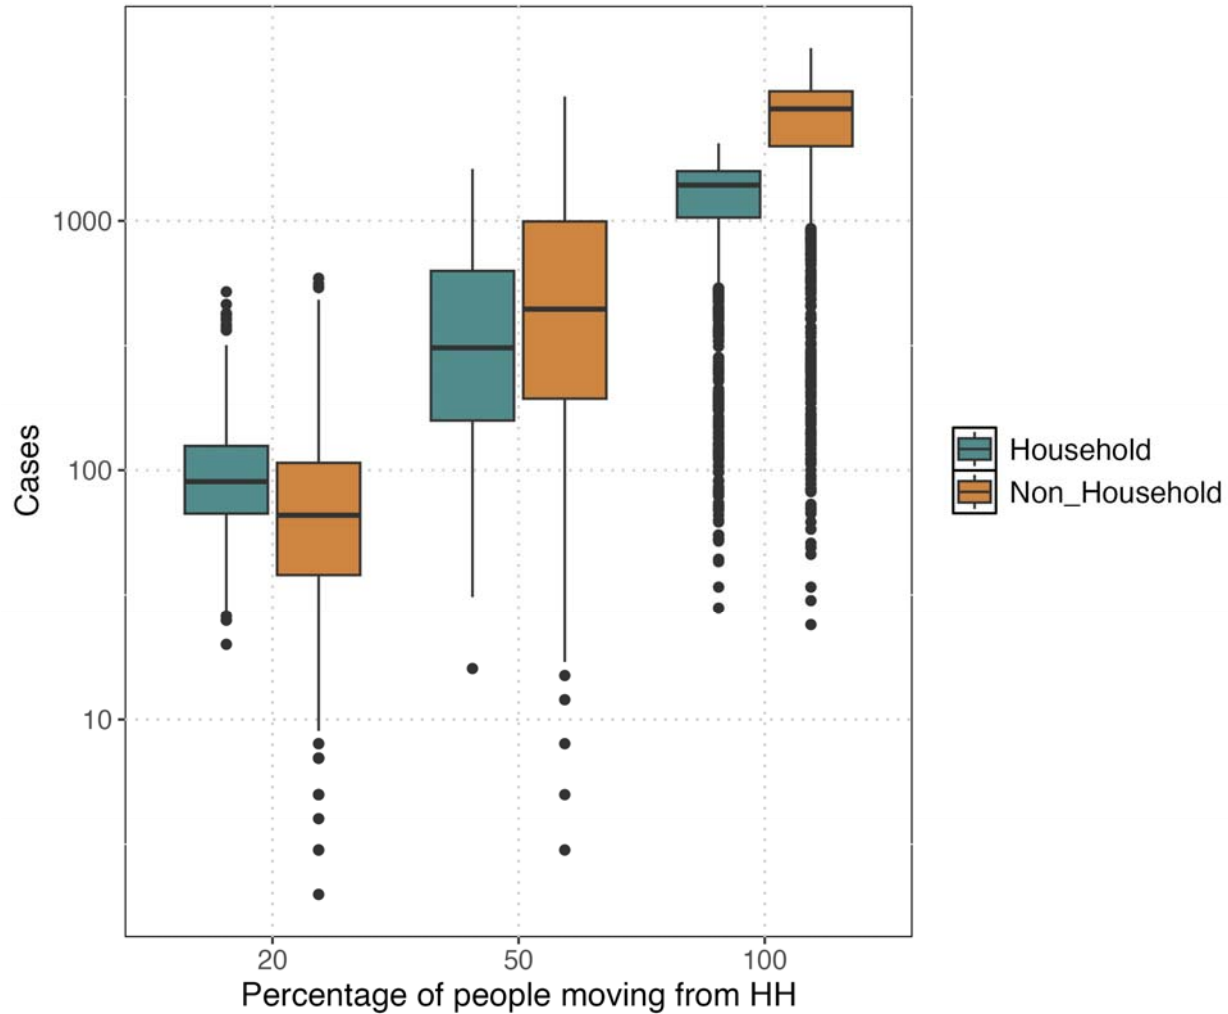

286

287 **Figure 3: Number of infections are higher in NH than HH at high levels of human**  
288 **movement but becomes more even when levels of transmission are low due to**  
289 **lower movement.** Three levels of human movement were assessed (20%, 50%, and  
290 100%) on three urban conformations (scattered, centered, or clustered). Boxplots show  
291 the distribution of total number of infections for 200 runs of two-year simulation where  
292 median is the horizontal line, the filled box is the interquartile (IQR) range, the whiskers  
293 show the values above and under the IQR and no more than 1.5·IQR, and dots  
294 represent values beyond this range. The y-axis is represented in  $\text{Log}_{10}$  scale.



295

296 Distance from HH to NH makes little difference in dengue burden

297 but defines level of spatial structure

298 Varying the distance between HH and NH had only slight impacts on the total number of

299 infections, with a slight increase in the number of cases with distance when NH are

300 clustered (Figure 4 and S3 Table). Besides these slight changes, differences among

301 urban conformations are still evident (Figure 4).

302

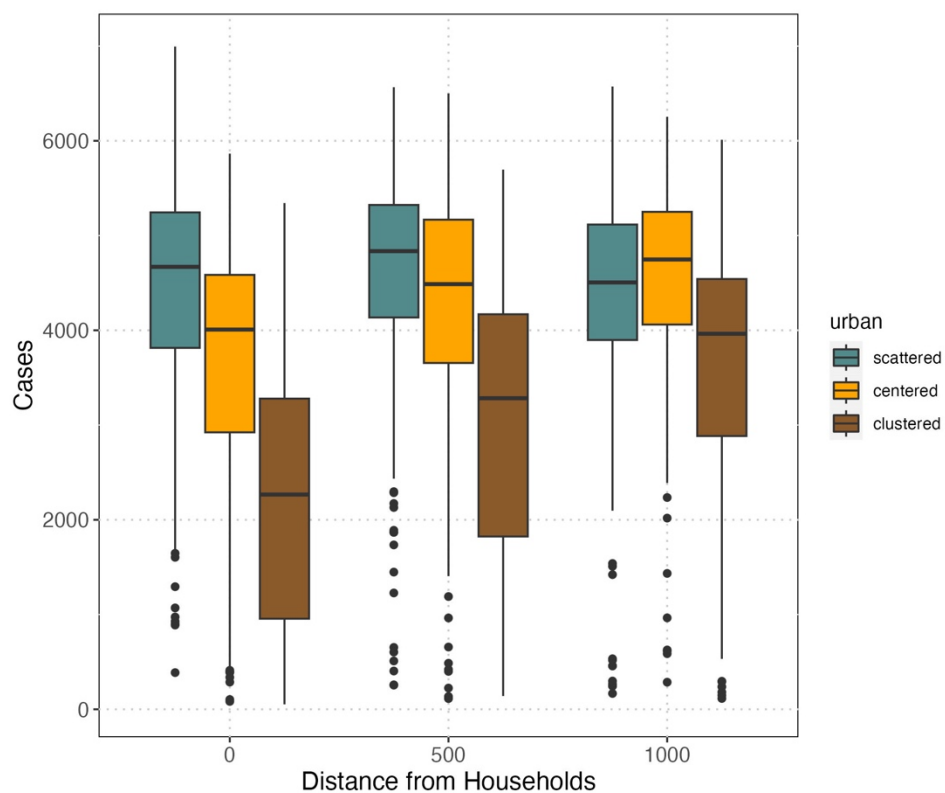

303

304 **Figure 4: Different distance regimes people travel from HH to NH results in slight**

305 **differences in cases and larger differences among configurations. Distance 0**

306 means people only visit the closest NH location from HH. On the three urban  
307 configuration scenarios, three levels of distance from HH to NH were assessed (the  
308 closest [categorized as 0], at least 500 meters, and at least 1000 meters). Boxplots are  
309 showing the total number of infections after two-year simulation for 200 runs.

310 Intrigued by the apparent lower importance of human movement distance in  
311 transmission, we wanted to explore further by assessing the spatial structure of cases.  
312 Given that the number of people moving affects the number of cases, we evaluated the  
313 spatial structuring when distance traveled is considered as well. In general, we found  
314 that irrespective of urban conformation, when people move short distances the level of  
315 spatial structure is higher, as expected (Figure 5). Similarly, the spatial structuring levels  
316 are also modified by the number of people moving, where lower levels of movement  
317 decrease Moran's  $I$ , thereby making cases more dispersed (Figure S6).

318

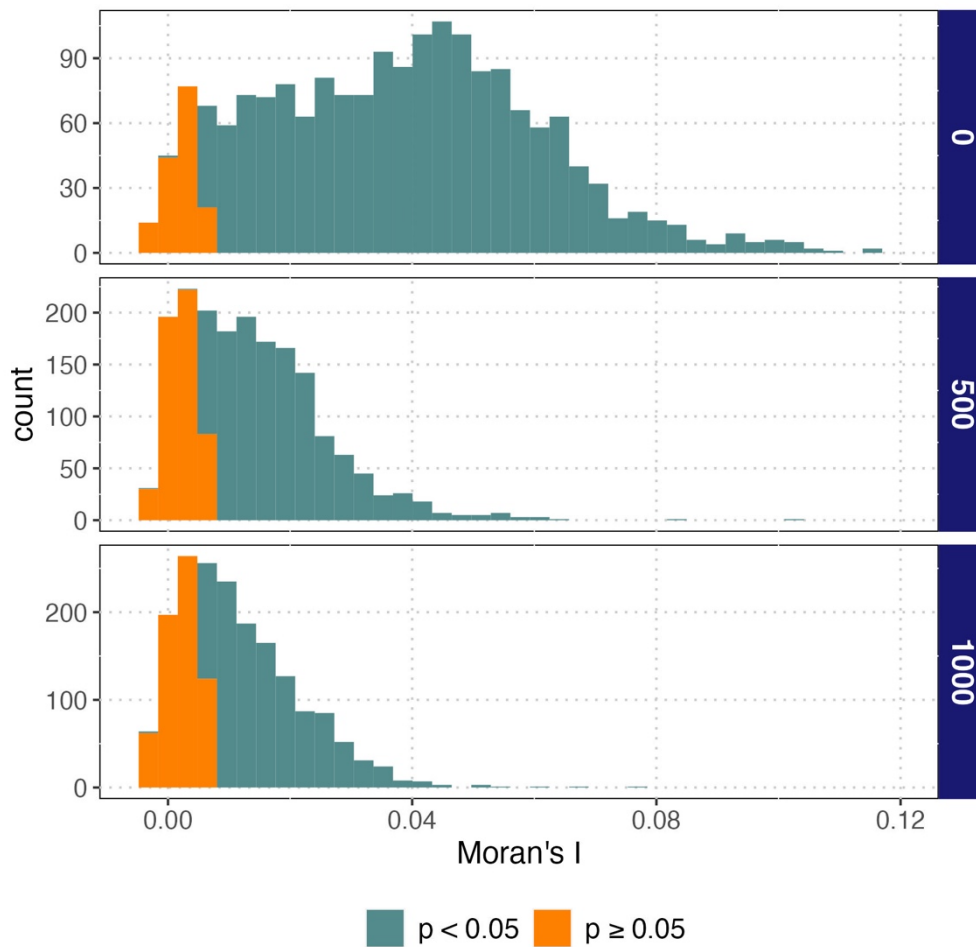

319

320 **Figure 5: Spatial structuring decreases with increased distance of movement.**

321 Distribution of Moran's I values for 200 simulations for each of the three distance

322 regimes is shown. Values that are both significantly ( $\alpha = 0.05$ ) and non-significantly

323 different from zero are displayed by color. Three levels of distance from HH to NH were

324 assessed (the closest [categorized as 0], at least 500 meters, and at least 1000 meters)

325 on three urban conformations (scattered, centered, or clustered).

326

327

## 328 Discussion

329 Despite recent results of this model showing an important role of NH environments for  
330 dengue transmission and control, where over half of infections occur in NH  
331 environments, it remained unknown how non-random mixing and mobility of humans  
332 and vectors affected dengue dynamics. [12]. By extending the ABM to consider  
333 spatially-explicit urban conformations and movement levels, we showed that human  
334 movement is a primary driver of dengue dynamics, irrespective of urban spatial  
335 configuration. Further, qualitatively similar, outcomes generated by simulating  
336 conditions from the coastal Kenyan city of Ukunda supports these results and can be  
337 found in supplemental material.

338 Among urban conformations, when NH spaces are scattered throughout the city it  
339 allows for closer connections to HH and therefore increased transmission. In this way,  
340 NH spaces serve as spreaders of infection since they are highly visited locations, which  
341 increases the chances of having a successful feeding encounter between humans and  
342 infected vectors. Once an individual is infected, the chances of infecting mosquitoes  
343 inside the household and in turn having another household inhabitant infected increases,  
344 generating local household chains of transmission.

345 For this reason, a lower number of individuals visiting NH locations tends to reduce the  
346 burden of dengue (Figure 2). In this sense, when the number of people visiting NH  
347 decreases, the number of infections happening in these spaces also decreases until  
348 becoming roughly even with the number of infections in HH. These results are  
349 supported by previous reports showing that when COVID-19 pandemic lockdowns

350 forced people to stay at home most of the time, the number of dengue cases was  
351 significantly reduced [16, 31, 32]. The idea of human movement guiding different levels  
352 of transmission is not new and has been explored previously, especially by Stoddard  
353 and colleagues (2009), who focused their study on the movement of individuals  
354 between houses only [13]. However, here we highlight how human mobility interacts  
355 with NH spaces as drivers of transmission, which then disseminates within households.  
356 As a result, when control is focused on households, it prevents the spread of disease to  
357 the remaining household inhabitants but leaves broader foci of transmission active as  
358 long as NH transmission is not under control.

359 Distance from HH to NH was not as important as overall levels of human movement for  
360 dengue burden (Figure 4). This supports our previous result by suggesting that it is not  
361 how far people are traveling but the destination and total amount of movement. This is  
362 in line with previous work where a large, longitudinal study in Iquitos, Peru showed that  
363 human infection risk is mainly driven by individuals visiting locations with presence of  
364 infected vectors, irrespective of the distance [14]. It is important to note that our model  
365 does not account for movement times, which increase with distance (but note that even  
366 our largest range of movement, >1000m, is still very localized within a city's limits).  
367 These NH spaces have been previously described to have mosquitoes [33] and hence  
368 represent some degree of risk for transmission when people are nearby. Unfortunately,  
369 we do not have data about the time people spend in NH locations. We think that the  
370 number of infections happening while people are moving through NH locations is likely  
371 to be negligible, but this merits further work.

372 The distance that people travel to NH does, however, affect the urban spatial dynamics  
373 of transmission. By increasing people's traveling distances we are also increasing the  
374 mixing of individuals. Distance traveled affects the level of clustering of cases, which is  
375 a measure of the level of spatial dependence of cases and hence of how cases are  
376 unevenly distributed in space (Figure 5) [30]. The clustering of cases considering the  
377 major role in transmission of NH is something that has not been explored before and  
378 deserves further exploration to understand its implication for disease control program  
379 design.

380

## 381 Conclusions

382 Although urban spatial configuration had subtle effects on the number and spatial  
383 structure of dengue infections, human movement between HH and NH had a much  
384 larger impact, with an 82% decline in cases as the number of people moving decreased  
385 from 100% to 50%. Together, these results reflect the importance of NH and human  
386 mobility between NH and HH spaces in dengue epidemiology. This underscores the  
387 importance of vector control in NH spaces, which is not currently implemented in many  
388 dengue endemic regions. Finally, though people's travel distance did not have a large  
389 impact on the number of cases, it is important for shaping spatial patterns, which can  
390 have implications for control activities and for local herd immunity.

391

## 392 Declarations

### 393 Ethics approval and consent to participate

394 This work specifically did not collect data from human samples or surveys. However, we  
395 acquired information from other works collecting such information. For those, ethical  
396 approval and oversight for data collection were obtained from the Institutional Review  
397 Board of Stanford University (IRB 31488), as well as the Kenya Medical Research  
398 Institutes (KEMRI SSC 2611) and Technical University of Mombasa Ethical Review  
399 Committee (TUM/ERC EXT/004/2019).

400

### 401 Consent for publication

402 Not applicable.

403

### 404 Availability of data and materials

405 The datasets generated and/or analyzed during the current study as well as the codes  
406 (including the agent-based model) are available in the GitHub repository  
407 ([https://github.com/vhpenagarcia/ABM\\_dengue](https://github.com/vhpenagarcia/ABM_dengue)) and have been archived within the  
408 Zenodo repository (<https://doi.org/10.5281/zenodo.14036270>).

409

### 410 Competing interests

411 The authors declare that they have no competing interests.

412

## 413 Funding

414 This research was funded by NIH through the grant R01AI102918 (PI LaBeaud). In  
415 addition, V.H.P.G. is supported by grants R01AI102918 and R35GM133439; E.A.M. is  
416 supported by NIH grants R35GM133439, R01AI102918, and R01AI168097, and NSF  
417 grant DEB-2011147 (with Fogarty International Center); A.D.L. is supported by grants  
418 R01AI102918, R01AI149614, R01AI155959, D43TW011547.

419

## 420 Authors' contributions

421 VHPG, EAM, and ADL conceptualized the study, developed the model and further  
422 modified it for the purposes of this study. VHPG analyzed the data and conducted the  
423 simulations. BAN, FMM, and DB collected and curated the data. All authors contributed  
424 to writing process and approved the final manuscript.

425

## 426 Acknowledgements

427 We would like to acknowledge Dr. Jason R. Andrews for the valuable input in this work.  
428 We would also acknowledge the fieldwork teams (in Kisumu: Joel Mbakaya, Samwel  
429 Ndire and Charles Adipo; in Ukunda: Said Lipi Malumbo, Paul S. Mutuku, Charles M.  
430 Ng'ang'a) who collected the data that made this work possible. We also acknowledge  
431 NIH for funding through project R01 AI102918 (ADL).

432

433

## 434 References



435

436 1. Guzman MG, Harris E: **Dengue**. *Lancet* 2015, **385**(9966):453-465.

437 2. Guzman MG, Gubler DJ, Izquierdo A, Martinez E, Halstead SB: **Dengue infection**. *Nat*  
438 *Rev Dis Primers* 2016, **2**:16055.

439 3. Scott TW, Amerasinghe PH, Morrison AC, Lorenz LH, Clark GG, Strickman D,  
440 Kittayapong P, Edman JD: **Longitudinal studies of *Aedes aegypti* (Diptera:**  
441 **Culicidae) in Thailand and Puerto Rico: blood feeding frequency**. *J Med Entomol*  
442 2000, **37**(1):89-101.

443 4. Scott TW, Chow E, Strickman D, Kittayapong P, Wirtz RA, Lorenz LH, Edman JD:  
444 **Blood-feeding patterns of *Aedes aegypti* (Diptera: Culicidae) collected in a rural**  
445 **Thai village**. *J Med Entomol* 1993, **30**(5):922-927.

446 5. Montenegro-Quiñonez CA, Louis VR, Horstick O, Velayudhan R, Dambach P, Runge-  
447 Ranzinger S: **Interventions against *Aedes*/dengue at the household level: a**  
448 **systematic review and meta-analysis**. *EBioMedicine* 2023, **93**:104660.

449 6. World Health Organization.: **Dengue guidelines for diagnosis, treatment, prevention**  
450 **and control : new edition**. Geneva: World Health Organization; 2009.

451 7. Huang CH, Lin CY, Yang CY, Chan TC, Chiang PH, Chen YH: **Relationship between**  
452 **the Incidence of Dengue Virus Transmission in Traditional Market and Climatic**  
453 **Conditions in Kaohsiung City**. *Can J Infect Dis Med Microbiol* 2021, **2021**:9916642.

454 8. Suwanbamrung C, Promsupa S, Doungsin T, Tongjan S: **Risk factors related to**  
455 **dengue infections in primary school students: exploring students' basic**  
456 **knowledge of dengue and examining the larval indices in southern Thailand**. *J*  
457 *Infect Public Health* 2013, **6**(5):347-357.

458 9. Barrera R, Acevedo V, Amador M: **Role of Abandoned and Vacant Houses on *Aedes***  
459 ***aegypti* Productivity**. *Am J Trop Med Hyg* 2021, **104**(1):145-150.

460 10. Kampango A, Furu P, Sarath DL, Haji KA, Konradsen F, Schiøler KL, Alifrangis M, Saleh  
461 F, Weldon CW: **Risk factors for occurrence and abundance of *Aedes aegypti* and**  
462 ***Aedes bromeliae* at hotel compounds in Zanzibar**. *Parasit Vectors* 2021, **14**(1):544.

463 11. Pérez-Pérez J, Peña-García VH, Calle-Tobón A, Quimbayo-Forero M, Rojo R, Henao E,  
464 Shragai T, Rúa-Urbe G: **Entomovirological Surveillance in Schools: Are They a**  
465 **Source for Arboviral Diseases Transmission?** *Int J Environ Res Public Health* 2021,  
466 **18**(11).

- 467 12. Peña-García VH, Desiree LaBeaud A, Ndenga BA, Mutuku FM, Bisanzio DA, Mordecai  
468 EA, Andrews JR: **Non-household environments make a major contribution to**  
469 **dengue transmission: Implications for vector control.** *medRxiv* 2024.
- 470 13. Stoddard ST, Morrison AC, Vazquez-Prokopec GM, Paz Soldan V, Kochel TJ, Kitron U,  
471 Elder JP, Scott TW: **The role of human movement in the transmission of vector-**  
472 **borne pathogens.** *PLoS Negl Trop Dis* 2009, **3(7):e481.**
- 473 14. Stoddard ST, Forshey BM, Morrison AC, Paz-Soldan VA, Vazquez-Prokopec GM,  
474 Astete H, Reiner RC, Vilcarromero S, Elder JP, Halsey ES *et al*: **House-to-house**  
475 **human movement drives dengue virus transmission.** *Proc Natl Acad Sci U S A* 2013,  
476 **110(3):994-999.**
- 477 15. Wesolowski A, Qureshi T, Boni MF, Sundsøy PR, Johansson MA, Rasheed SB, Engø-  
478 Monsen K, Buckee CO: **Impact of human mobility on the emergence of dengue**  
479 **epidemics in Pakistan.** *Proc Natl Acad Sci U S A* 2015, **112(38):11887-11892.**
- 480 16. Liyanage P, Rocklöv J, Tissera HA: **The impact of COVID-19 lockdown on dengue**  
481 **transmission in Sri Lanka; A natural experiment for understanding the influence of**  
482 **human mobility.** *PLoS Negl Trop Dis* 2021, **15(6):e0009420.**
- 483 17. Massaro E, Kondor D, Ratti C: **Assessing the interplay between human mobility and**  
484 **mosquito borne diseases in urban environments.** *Sci Rep* 2019, **9(1):16911.**
- 485 18. Peña-García VH, Mutuku FM, Ndenga BA, Mbakaya JO, Ndire SO, Agola GA, Mutuku  
486 PS, Malumbo SL, Ng'ang'a CM, Andrews JR *et al*: **The Importance of Including Non-**  
487 **Household Environments in Dengue Vector Control Activities.** *Viruses* 2023, **15(7).**
- 488 19. Mordecai EA, Cohen JM, Evans MV, Gudapati P, Johnson LR, Lippi CA, Miazgowicz K,  
489 Murdock CC, Rohr JR, Ryan SJ *et al*: **Detecting the impact of temperature on**  
490 **transmission of Zika, dengue, and chikungunya using mechanistic models.** *PLoS*  
491 *Negl Trop Dis* 2017, **11(4):e0005568.**
- 492 20. Huber JH, Childs ML, Caldwell JM, Mordecai EA: **Seasonal temperature variation**  
493 **influences climate suitability for dengue, chikungunya, and Zika transmission.**  
494 *PLoS Negl Trop Dis* 2018, **12(5):e0006451.**
- 495 21. Caldwell JM, LaBeaud AD, Lambin EF, Stewart-Ibarra AM, Ndenga BA, Mutuku FM,  
496 Krystosik AR, Ayala EB, Anyamba A, Borbor-Cordova MJ *et al*: **Climate predicts**  
497 **geographic and temporal variation in mosquito-borne disease dynamics on two**  
498 **continents.** *Nat Commun* 2021, **12(1):1233.**
- 499 22. Inziani M, Adungo F, Awando J, Kihoro R, Inoue S, Morita K, Obimbo E, Onyango F,  
500 Mwau M: **Seroprevalence of yellow fever, dengue, West Nile and chikungunya**  
501 **viruses in children in Teso South Sub-County, Western Kenya.** *Int J Infect Dis* 2020,  
502 **91:104-110.**

- 503 23. Sabin AB: **The dengue group of viruses and its family relationships.** *Bacteriol Rev*  
504 1950, **14**(3):225-232.
- 505 24. Sabin AB: **Research on dengue during World War II.** *Am J Trop Med Hyg* 1952,  
506 **1**(1):30-50.
- 507 25. McCormack CP, Ghani AC, Ferguson NM: **Fine-scale modelling finds that breeding  
508 site fragmentation can reduce mosquito population persistence.** *Commun Biol*  
509 2019, **2**:273.
- 510 26. Nathan R, Klein E, Robledo-Arnuncio JJ, Revilla E: **Dispersal kernels: review.** In:  
511 *Dispersal Ecology and Evolution.* edn. Edited by Clobert J, Baguette M, Benton TG,  
512 Bullock JM: Oxford University Press; 2012: 0.
- 513 27. Marcantonio M, Reyes T, Barker CM: **Quantifying *Aedes aegypti* dispersal in space  
514 and time: a modeling approach.** *Ecosphere* 2019, **10**(12):e02977.
- 515 28. Moore TC, Brown HE: **Estimating *Aedes aegypti* (Diptera: Culicidae) Flight  
516 Distance: Meta-Data Analysis.** *J Med Entomol* 2022, **59**(4):1164-1170.
- 517 29. Moran PAP: **The Interpretation of Statistical Maps.** *Journal of the Royal Statistical  
518 Society: Series B (Methodological)* 1948, **10**(2):243-251.
- 519 30. Pfeiffer DU, Robinson TP, Stevenson M, Stevens KB, Rogers DJ, Clements ACA:  
520 **Spatial clustering of disease and global estimates of spatial clustering.** In: *Spatial  
521 Analysis in Epidemiology.* edn.: Oxford University Press; 2008: 0.
- 522 31. Wilder-Smith A: **Dengue during the COVID-19 pandemic.** *J Travel Med* 2021, **28**(8).
- 523 32. Sasmono RT, Santoso MS: **Movement dynamics: reduced dengue cases during the  
524 COVID-19 pandemic.** *Lancet Infect Dis* 2022, **22**(5):570-571.
- 525 33. Ngugi HN, Mutuku FM, Ndenga BA, Musunzaji PS, Mbakaya JO, Aswani P, Irungu LW,  
526 Mukoko D, Vulule J, Kitron U *et al*: **Characterization and productivity profiles of  
527 *Aedes aegypti* (L.) breeding habitats across rural and urban landscapes in  
528 western and coastal Kenya.** *Parasit Vectors* 2017, **10**(1):331.
- 529

Scattered

Centered

Clustered

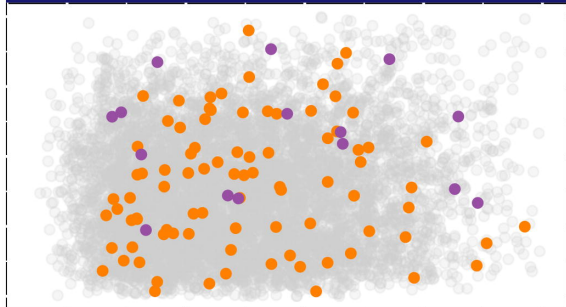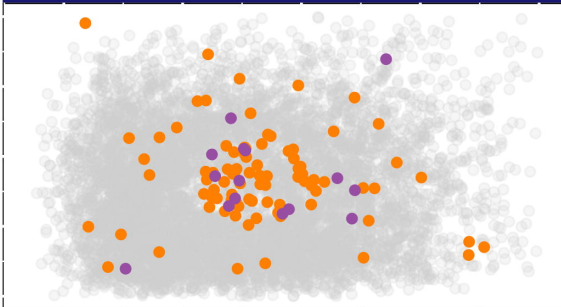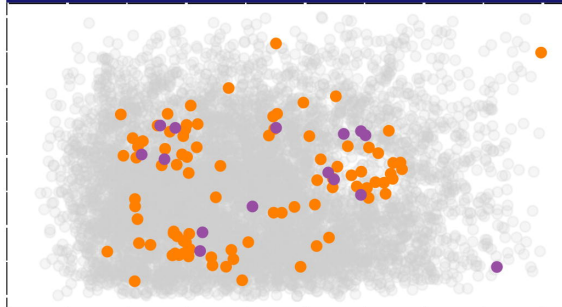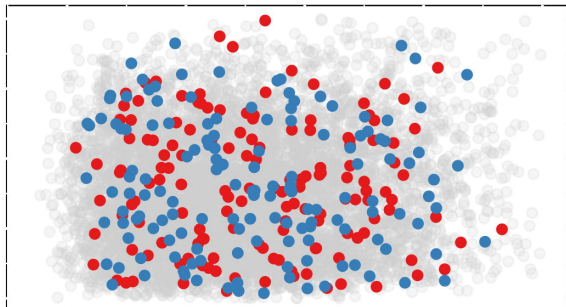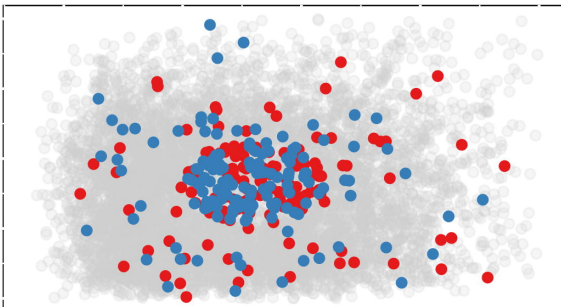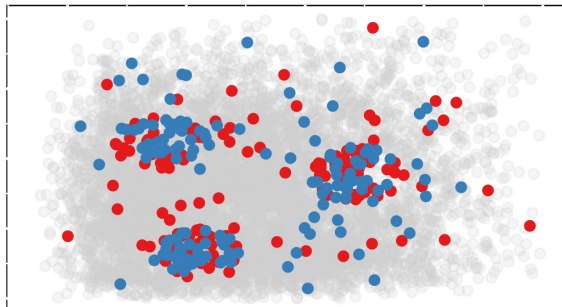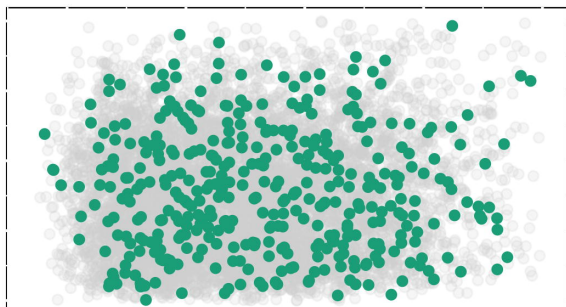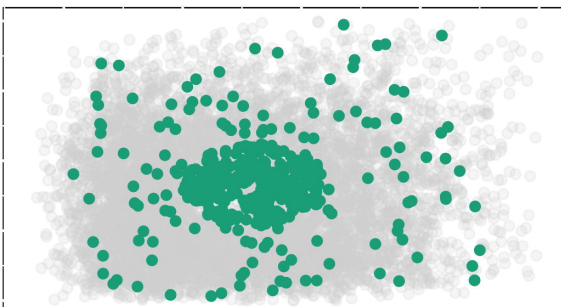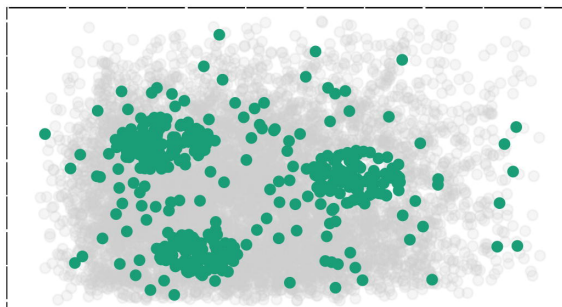

• Workplace • Market • Religious • Recreational • School

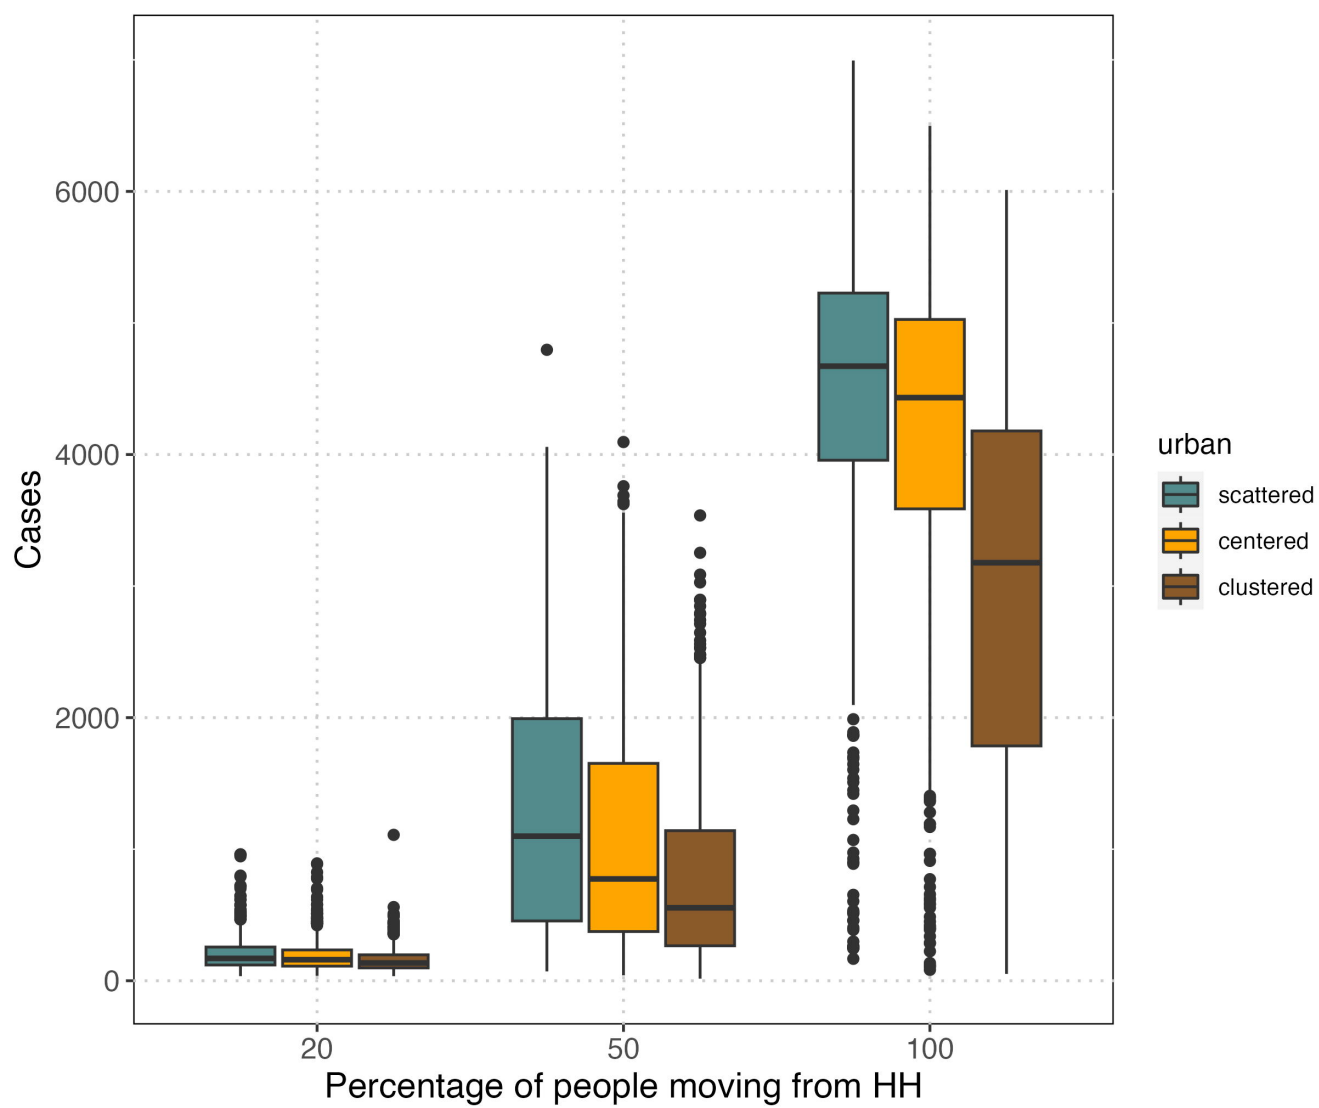

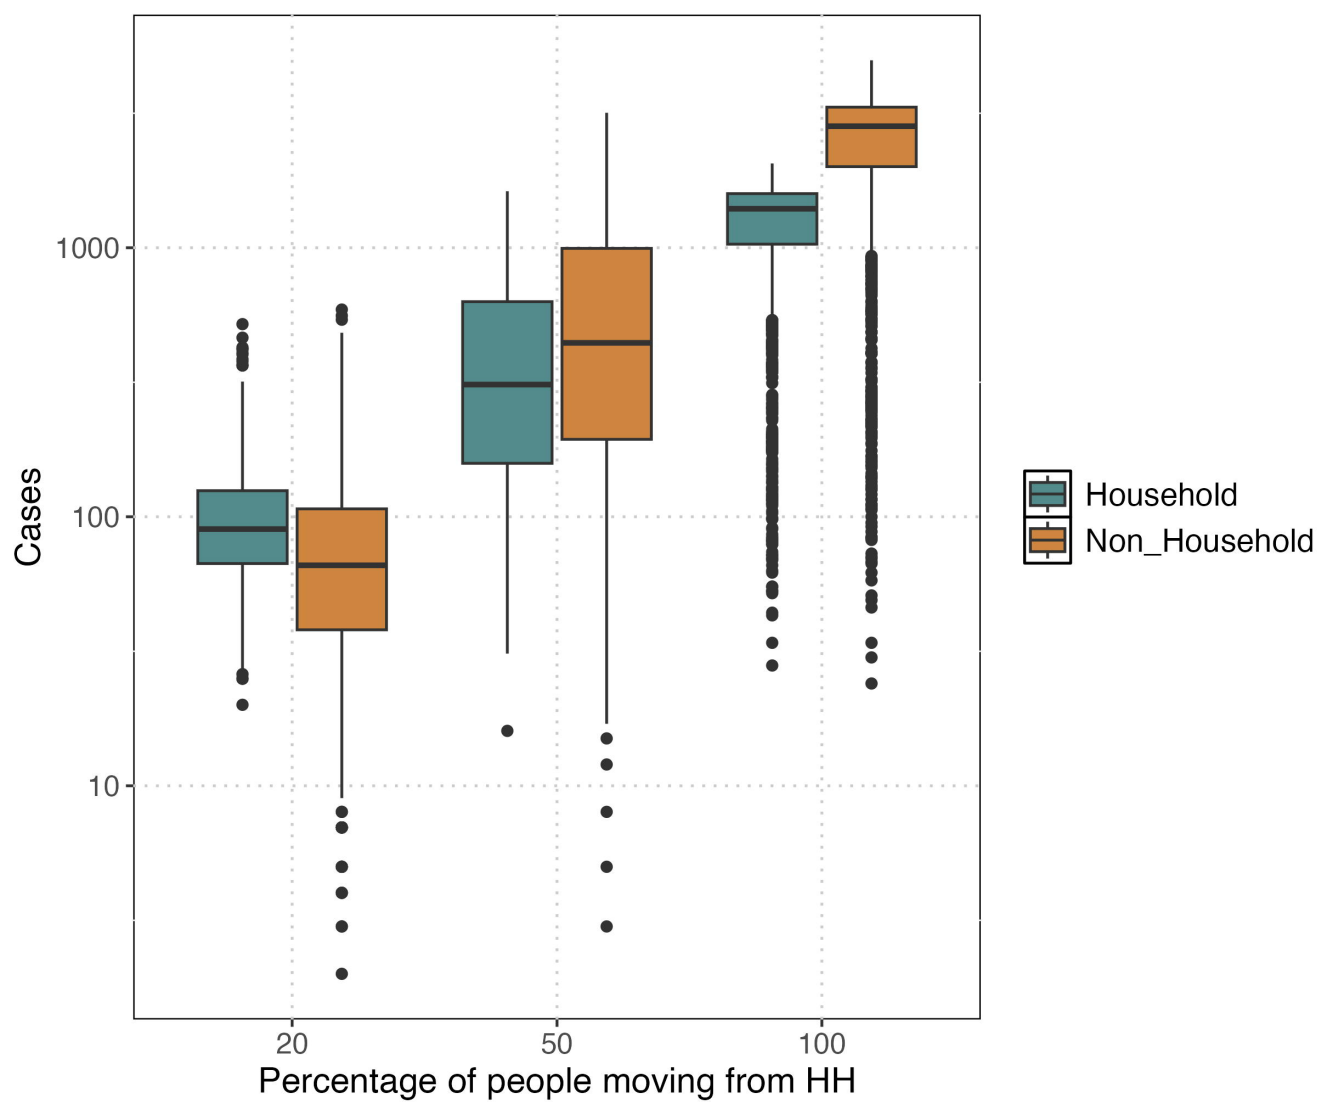

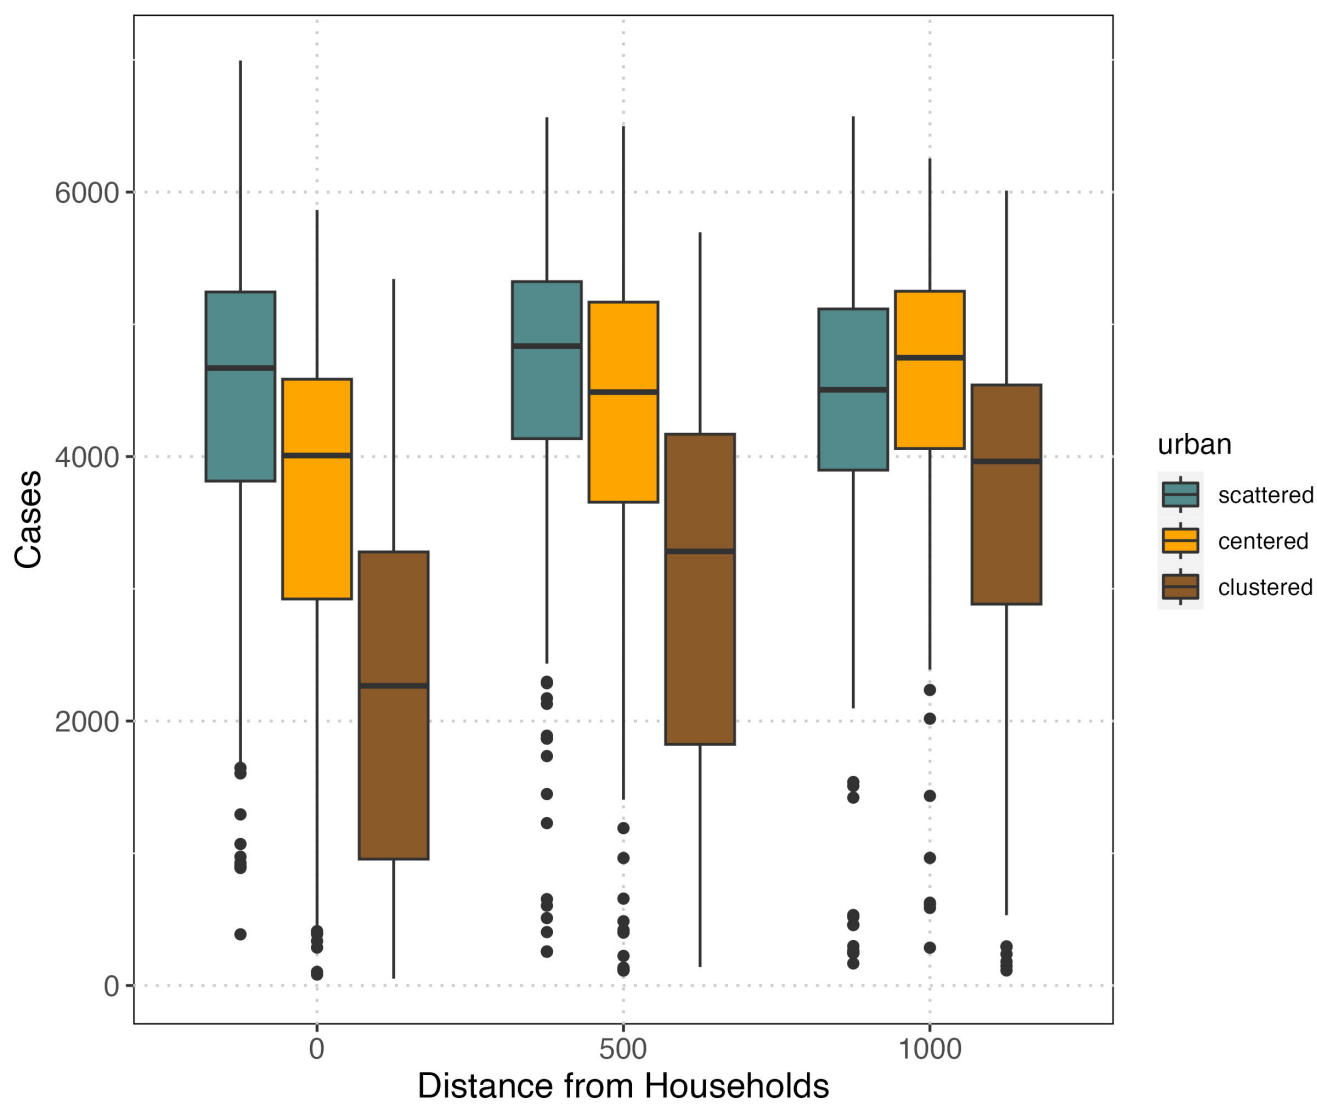

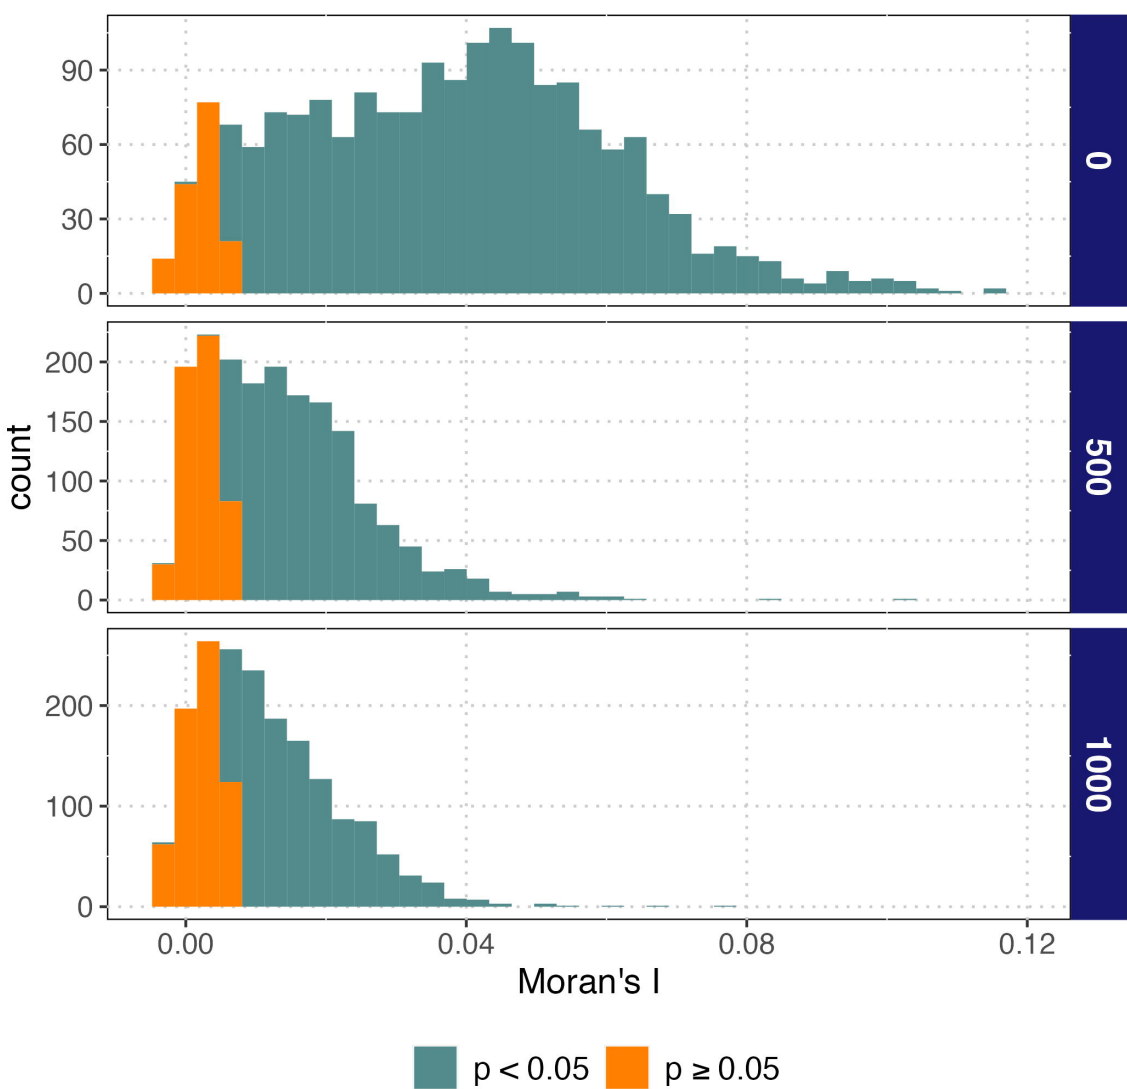

Source: https://medrxiv.org/content/10.1101/2024.05.28.24308061v2.full.pdf
